# Supplementary material for: Measuring specialization in species interaction networks.
Source: Springer Nature journal article supplement (doi:10.1186/1472-6785-6-9), 2006-01-01

(A) Britain: pollinators

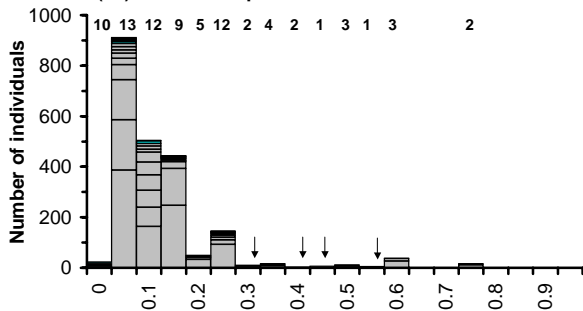

(B) Argentina: pollinators

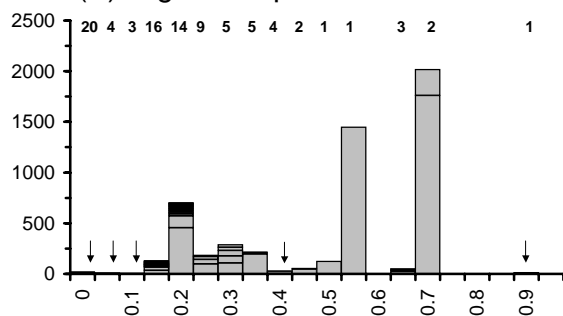

(C) Britain: plants

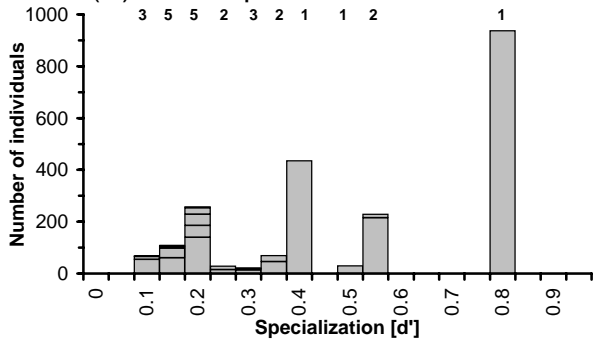

(D) Argentina: plants

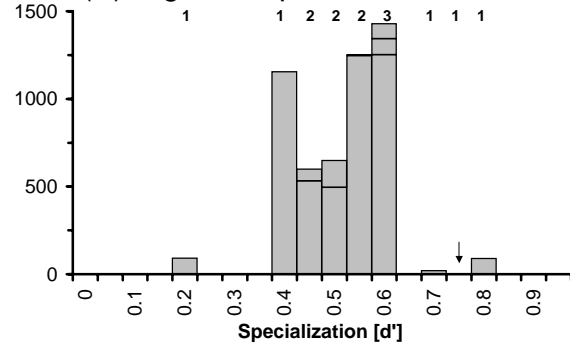

Supplement: 12898_2006_62_MOESM1_ESM.pdf [file 12898_2006_62_MOESM1_ESM.pdf]
