# Supplementary material for: Measuring specialization in species interaction networks.
Source: Springer Nature journal article supplement (doi:10.1186/1472-6785-6-9), 2006-01-01

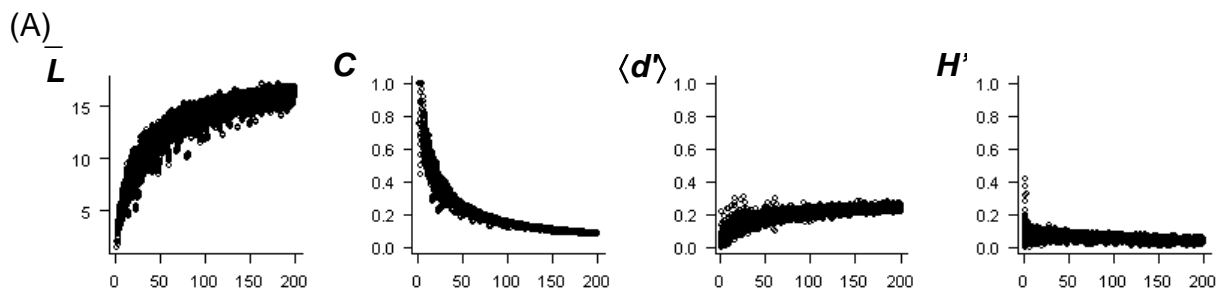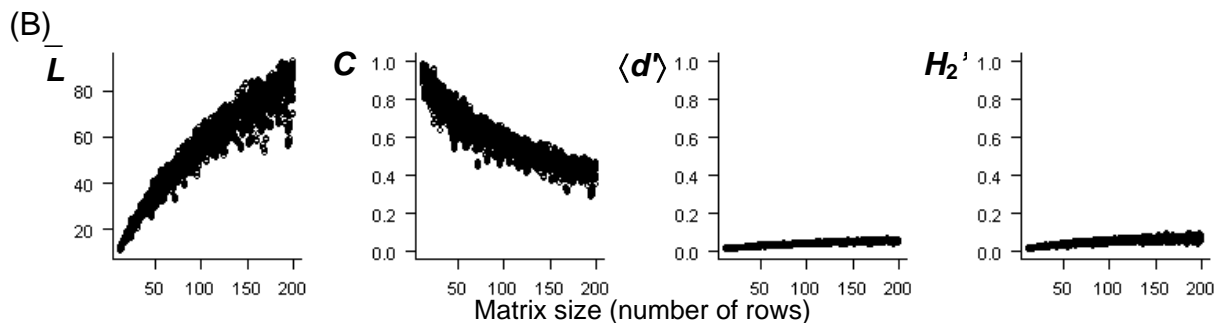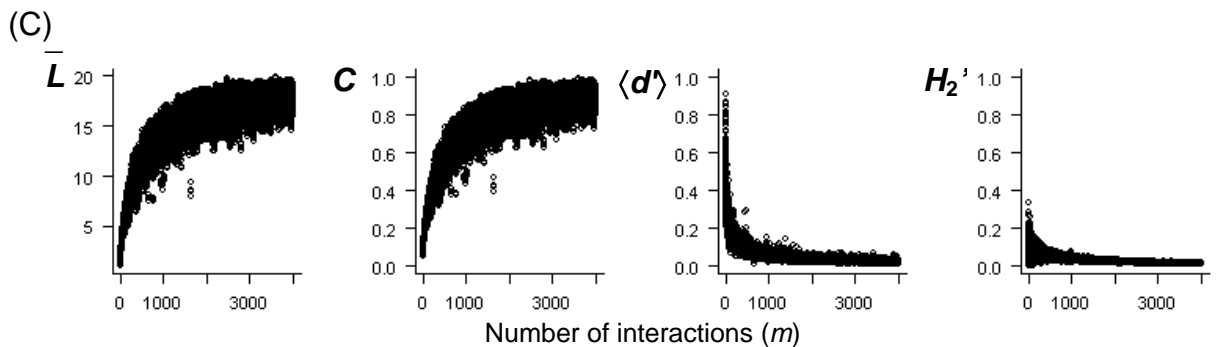

Supplement: 12898_2006_62_MOESM3_ESM.pdf [file 12898_2006_62_MOESM3_ESM.pdf]
